# Supplementary material
Source: Research Square preprint supplement (doi:10.21203/rs.3.rs-9569886/v1)
Supplement: Supplementary file 1 [file f3b9d9999e0bd54479cad5ae.docx]

**Appendix A**

Brief Resilience Scale (BRS)

**Brief Resilience Scale (BRS)**

Please indicate the extent to which you agree with each of the following statements by using the

following scale: 1 = strongly disagree, 2 = disagree, 3 = neutral, 4 = agree, 5 = strongly agree.

1. I tend to bounce back quickly after hard times

2. I have a hard time making it through stressful events

3. It does not take me long to recover from a stressful event

4. It is hard for me to snap back when something bad happens

5. I usually come through difficult times with little trouble

6. I tend to take a long time to get over setbacks in my life

**Appendix B**

Social Support Scale (SSS)

**Social Support Scale (SSS)**

Please indicate the extent to which you agree with each of the following statements by using the

following scale: 1 = strongly disagree, 2 = disagree, 3 = neutral, 4 = agree, 5 = strongly agree.

1. There are people in my life who pay attention to my feelings and problems

2. There are people in my life who appreciate what I do

3. There are people in my life who I can get help from if I need it

4. There are people in my life who I can talk to about how to handle things

**Appendix C**

Social Comparison Scale (SCS)

**Social Comparison Scale (SCS)**

Please select a number at a point which best describes the way in which you see yourself in comparison to others.

For example:

Short - 1 2 3 4 5 6 7 8 9 10

If you put a mark at 3 this means you see yourself as shorter than others; if you put a mark at 5 (middle) about average; and a mark at 7 somewhat taller. If you understand the above instructions, please proceed.

Select one number on each line according to how you see yourself in relationship to others. In relationship to others, I feel:

1. Inferior/ Superior

2. Unlikable/ More likable

3. Left out/ Accepted

4. Different/ Same

5. Untalented/ More talented

6. Weaker/ Stronger

7. Unconfident/ More confident

8. Undesirable/ More desirable

9. Unattractive/ More attractive

10. An insider/ Outsider

11. Incompetent/ More competent

**Appendix D**

Ten-Item Personality Inventory (TIPI)

**Ten-Item Personality Inventory (TIPI)**

Here are a number of personality traits that may or may not apply to you. Please write a number next to each statement to indicate the extent to which you agree or disagree with that statement. You should rate the extent to which the pair of traits applies to you, even if one characteristic applies more strongly than the other, using the following scale: 1 = Disagree strongly, 2 = Disagree moderately, 3 = Disagree a little, 4 = Neither agree nor disagree, 5 = Agree a little, 6 = Agree moderately, 7 = Agree strongly

I see myself as:

1. Extraverted, enthusiastic
2. Critical, quarrelsome
3. Dependable, self-disciplined
4. Anxious, easily upset
5. Open to new experiences, complex
6. Reserved, quiet
7. Sympathetic, warm
8. Disorganized, careless
9. Calm, emotionally stable
10. Conventional, uncreative

**Appendix E**

**Organizational Status**

What is your level of supervisory responsibility?

1. None
2. Team Leader (informal, not responsible for rating performance)
3. First-line supervisor (formal, responsible for rating performance)
4. Manager (division, service, etc.)
5. Executive (e.g., Associate Director, Chief of Staff, Program Director)
6. Senior Executive (e.g., President, Network Director, CEO)
